# Supplementary material
Source: PubMed Central journal article supplement (PMC6173285)

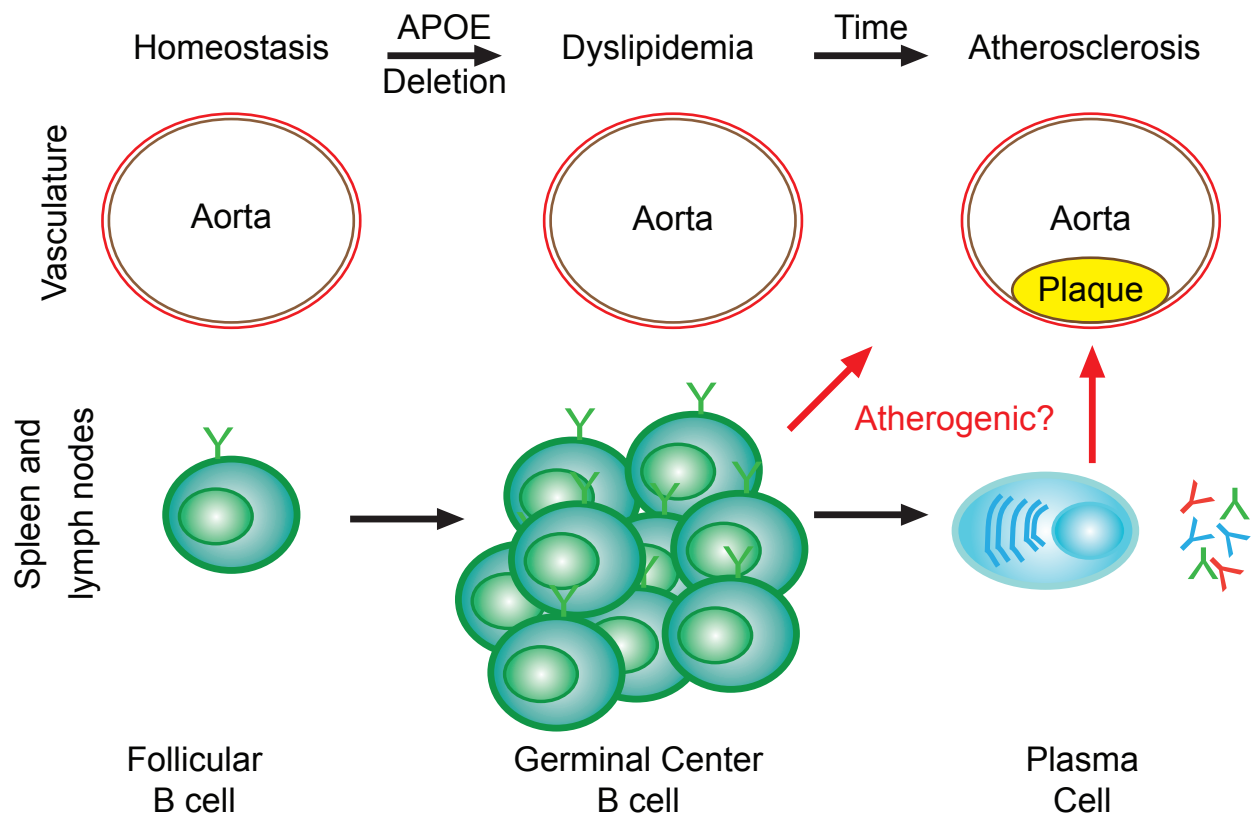

Supplement: NIHMS77973-supplement-Graphical_abstract.pdf [file NIHMS77973-supplement-Graphical_abstract.pdf]
